# Supplementary material
Source: Springer Nature journal article supplement (https://www.springermedizin.de/resource/supplementary/12939_2013_392_MOESM1_ESM.pdf/9551048)

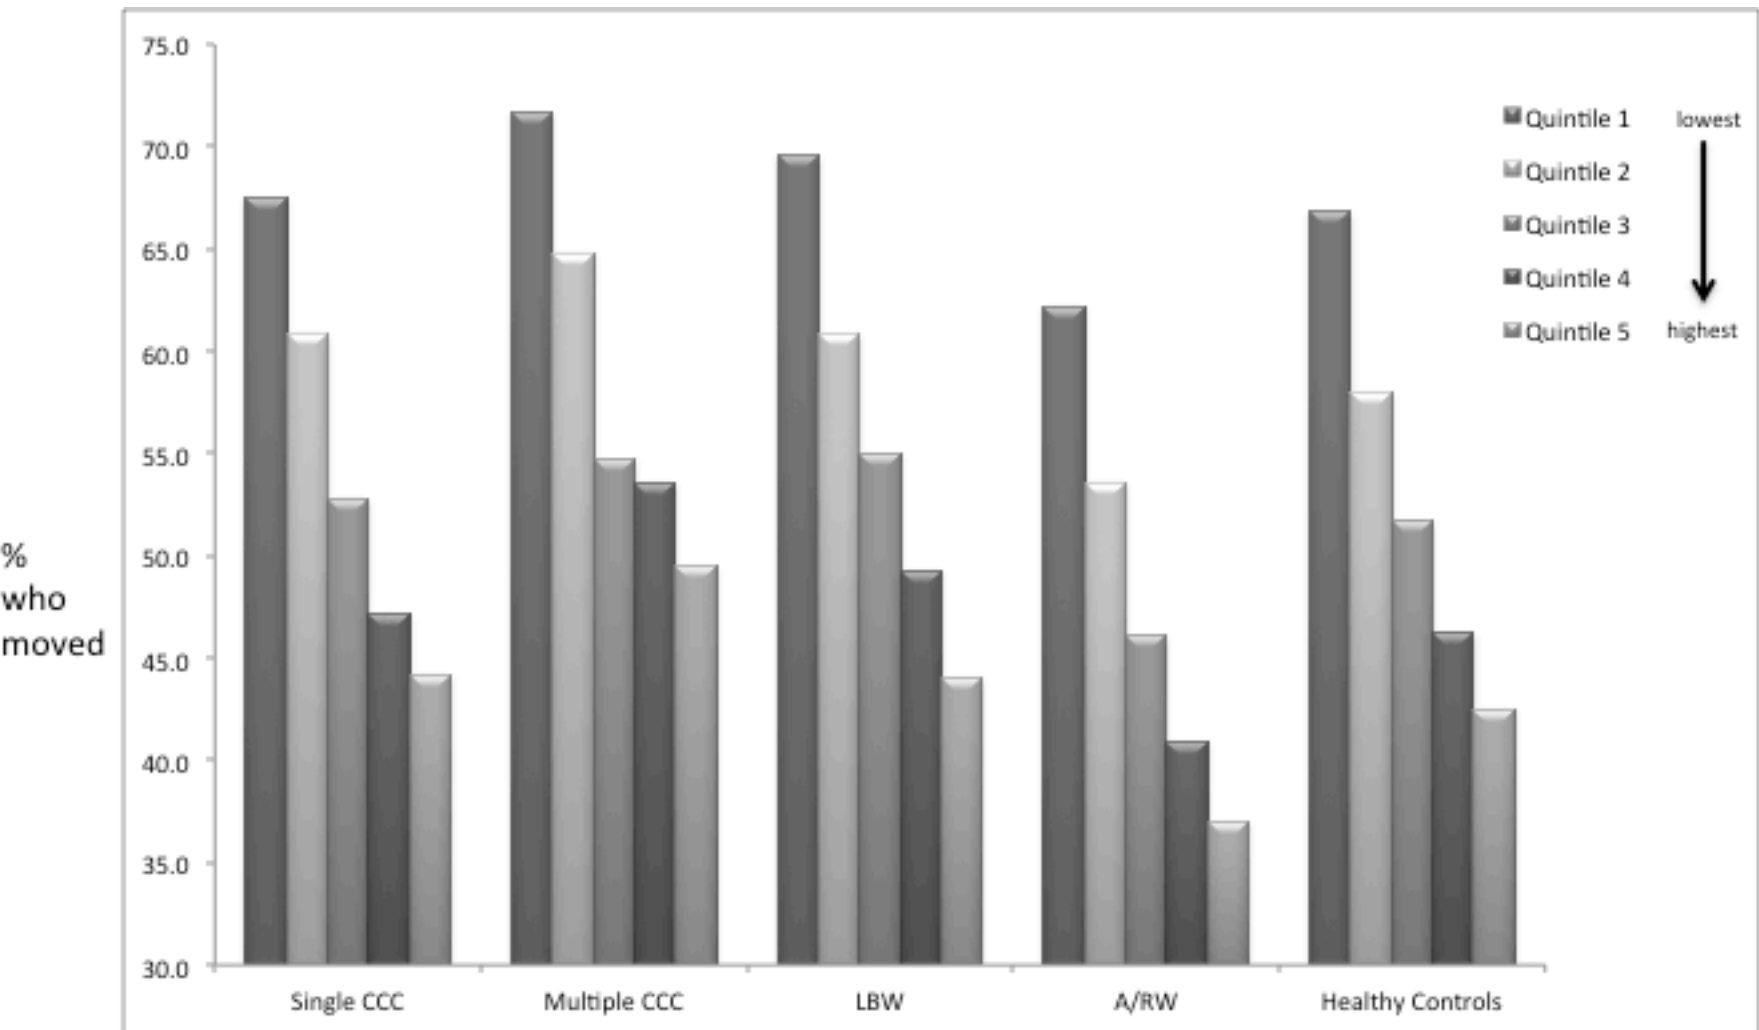

Supplement: MOESM1 [file 9551048]
